# Supplementary material for: Effective mitigation of gadolinium deposition using the bidentate hydroxypyridinone ligand Me-3,2-HOPO
Source: Royal Society of Chemistry journal article supplement (doi:10.1039/d2dt00747a), 2022-01-01
Supplement: d2dt00747a1.pdf [file d2dt00747a1.pdf]

## Supporting information *for*

# Effective Mitigation of Gadolinium Deposition Using the Bidentate Hydroxypyridinone Ligand Me-3,2-HOPO†

Qiwen Sun,<sup>#</sup> Xiaomei Wang,<sup>#</sup> Cen Shi,<sup>#</sup> Jingwen Guan, Lanhua Chen, Yumin Wang, Shuao Wang, and Juan Diwu\*

State Key Laboratory of Radiation Medicine and Protection, School for Radiological and Interdisciplinary Sciences (RAD-X) and Collaborative Innovation Center of Radiation Medicine of Jiangsu Higher Education Institutions, Soochow University, Suzhou 215123, China.

## Table of Contents

### S1. Potentiometric titration

### S2. Structure characterization of Gd-Me-3,2-HOPO

### S3. Cytotoxicity of Gd(III)

### S4. Cytotoxicity of Gd(III) and chelating agents

### S5. Gd(III) removal

## S1. Potentiometric titration

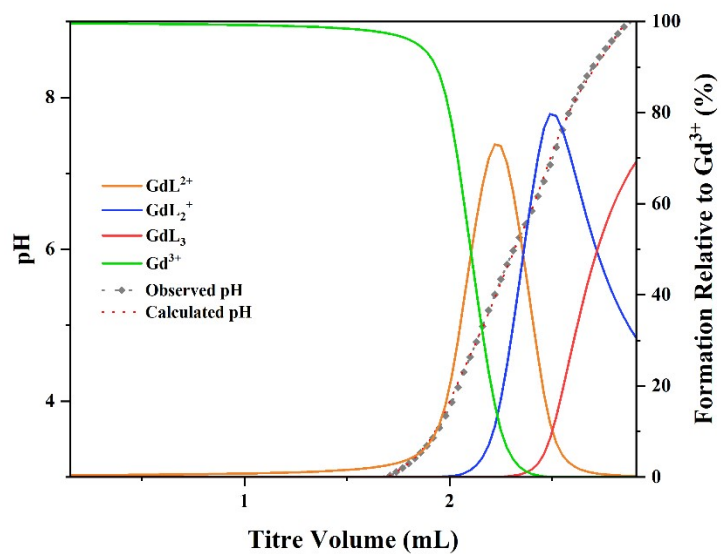

**Figure S1.** Potentiometric data of titre volume and pH are superimposed on speciation (gray circles and red dots are observed and calculated pH, respectively). Me-3,2-HOPO is denoted as HL.

## S2. Structure characterization of Gd-Me-3,2-HOPO

The X-ray diffraction data of a Gd-Me-3,2-HOPO single crystal were collected on a Bruker D8-Venture single-crystal X-ray diffractometer with a digital camera, and the crystal was mounted on a cryoloop with paratone oil. The data were collected with a Turbo X-ray Source (Mo K $\alpha$  radiation,  $\lambda = 0.71073\text{\AA}$ ) at room temperature, which adopted the direct-drive rotating anode technique and a CMOS detector. For the Gd-Me-3,2-HOPO compound, a total of 4836 reflections were collected within the range  $2.490 < 2\theta < 27.509$ ,  $-12 < h < 12$ ,  $-13 < k < 13$ ,  $-14 < l < 14$ , and 4265 reflections were used for refinement. The final R1 is 0.0257. The structure of Gd-Me-3,2-HOPO was refined using SHELXTL-2017 based on the full-matrix least-squares method, and the nonhydrogen atoms were refined with anisotropic displacement parameters.<sup>1</sup>The detailed crystallographic data are listed in **Table S1, S2**.

**Table S1.** Crystallographic data and refinement details for the compound of Gd-Me-3,2-HOPO (CCDC : 2110132).

| Gd-Me-3,2-HOPO                            |                                                                                                                                                            |
|-------------------------------------------|------------------------------------------------------------------------------------------------------------------------------------------------------------|
| Formula                                   | Gd(H <sub>2</sub> O) <sub>3</sub> [(C <sub>6</sub> H <sub>6</sub> NO <sub>2</sub> )(C <sub>6</sub> H <sub>7</sub> NO <sub>2</sub> )]·2Cl·3H <sub>2</sub> O |
| F. W.                                     | 1168.96                                                                                                                                                    |
| Crystal system                            | triclinic                                                                                                                                                  |
| Space group                               | $P\bar{1}$                                                                                                                                                 |
| $a / \text{\AA}$                          | 9.9405(4)                                                                                                                                                  |
| $b / \text{\AA}$                          | 10.7661(4)                                                                                                                                                 |
| $c / \text{\AA}$                          | 11.2466(4)                                                                                                                                                 |
| $\alpha / \text{deg}$                     | 102.2250(10)                                                                                                                                               |
| $\beta / \text{deg}$                      | 90.6250(10)                                                                                                                                                |
| $\gamma / \text{deg}$                     | 115.2960(10)                                                                                                                                               |
| $V / \text{\AA}^3$                        | 1056.50(7)                                                                                                                                                 |
| Z                                         | 1                                                                                                                                                          |
| $\rho_{\text{calcd}} / \text{g cm}^{-3}$  | 1.837                                                                                                                                                      |
| $\mu(\text{Mo K}\alpha) / \text{mm}^{-1}$ | 3.440                                                                                                                                                      |
| R1, $wR_2[I > 2\sigma(I)]^a$              | 0.0257, 0.0594                                                                                                                                             |
| R1, $wR_2(\text{all data})^a$             | 0.0353, 0.0679                                                                                                                                             |

<sup>a.</sup>  $R_1 = \sum||F_o| - |F_c|| / \sum|F_o|$ ,  $wR_2 = [\sum w(F_o^2 - F_c^2)^2 / \sum w(F_o^2)^2]^{1/2}$

**Table S2.** Selected bond distances (Å) and Bond Valence (v.u. valence unit) for Gd-Me-3,2-HOPO.

| Bond Distances (Å) |          | BV (v. u.) | Bond Distances (Å) |          |
|--------------------|----------|------------|--------------------|----------|
| Gd1-O1             | 2.417(3) | 0.386      |                    |          |
| Gd1-O2             | 2.397(3) | 0.408      |                    |          |
| Gd1-O3             | 2.399(3) | 0.405      |                    |          |
| Gd1-O4             | 2.333(2) | 0.486      | O4-C10             | 1.271(4) |
| Gd1-O5             | 2.542(2) | 0.275      | O5-C9              | 1.363(4) |
| Gd1-O6             | 2.359(2) | 0.452      | O6-C11             | 1.268(4) |
| Gd1-O7             | 2.379(2) | 0.428      | O7-C12             | 1.343(4) |
| Gd1-O7             | 2.379(2) | 0.428      |                    |          |

$BV = v_{ij} = \exp[(R_{ij} - d_{ij})/b]$ ,  $v_{ij}$  is the valence of the bond between two atoms  $i$  and  $j$ ,  $d_{ij}$  is the bond length between the two atoms,  $R_{ij}$  is the bond valence parameter, and  $b$  is a constant of  $0.37 \text{ \AA}^2$ .

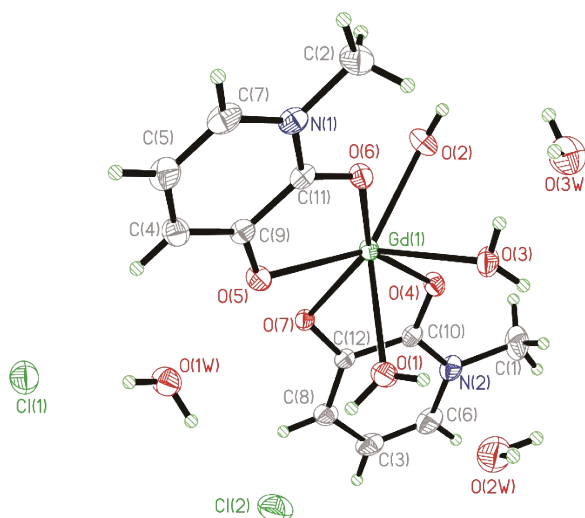

**Figure S2.** Perspective view of the crystal structure of Gd-Me-3,2-HOPO, illustrating the atom-numbering scheme. Atoms are drawn as ellipsoids of 30 % probability and hydrogen atoms as spheres of radius  $0.2 \text{ \AA}$ .

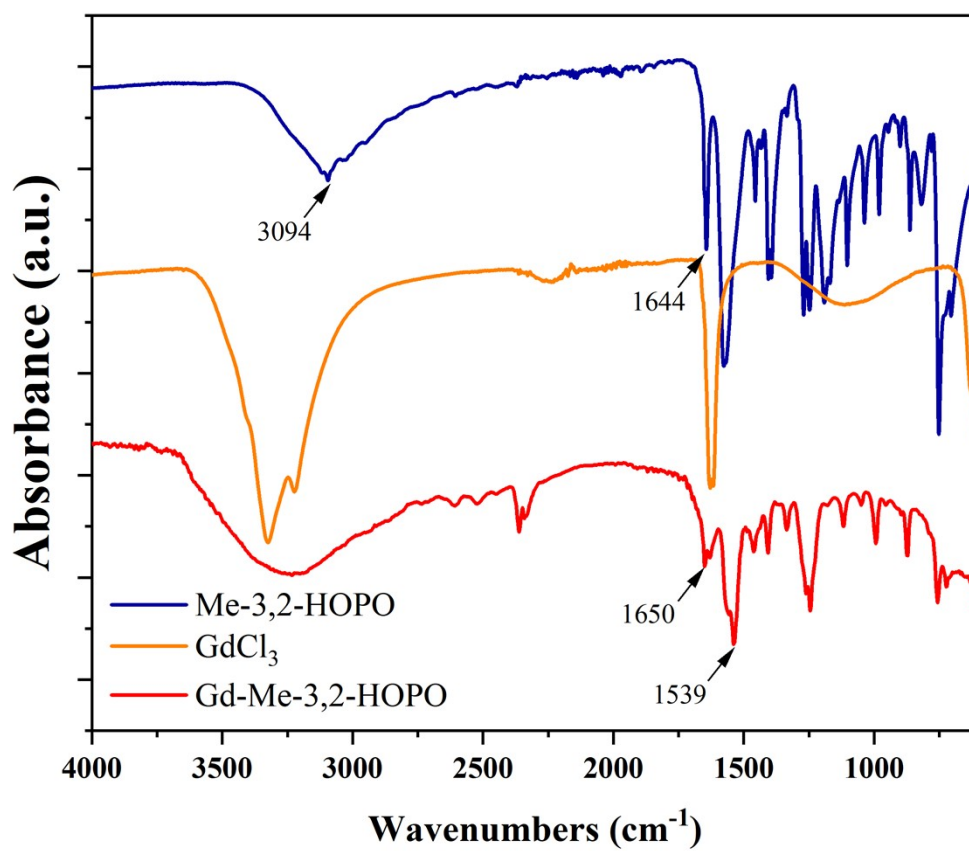

**Figure S3.** ATR-FT-IR absorption spectra of GdCl<sub>3</sub>, Me-3,2-HOPO, and Gd-Me-3,2-HOPO.

### S3. Cytotoxicity of Gd(III)

**Table S3.** Dosage-dependent cell growth rate of NRK-52E and AML-12 cells treated with different concentrations of Gd(III), n = 6, \*p < 0.05, \*\*p < 0.01, \*\*\*p < 0.001 vs control.

| Concentration ( $\mu\text{M}$ ) | NRK-52E cells Survival Rate (%) | AML-12 cells Survival Rate (%) |
|---------------------------------|---------------------------------|--------------------------------|
| 10                              | 102.87 $\pm$ 10.21              | 94.17 $\pm$ 8.99               |
| 25                              | 89.11 $\pm$ 9.27*               | 95.46 $\pm$ 7.58               |
| 50                              | 76.57 $\pm$ 5.82***             | 97.37 $\pm$ 10.23              |
| 75                              | 65.00 $\pm$ 4.26***             | 83.41 $\pm$ 8.06**             |
| 100                             | 63.40 $\pm$ 4.48***             | 93.72 $\pm$ 4.74               |

## S4. Cytotoxicity of Gd(III) and chelating agents

**Table S4.** Dosage-dependent cell growth rate of NRK-52E cells treated with 25  $\mu$ M Gd(III) and different concentrations of ligand (DTPA-ZnNa<sub>3</sub> or Me-3,2-HOPO), n = 6, \*p < 0.05, \*\*p < 0.01, \*\*\*p < 0.001 vs control.

| Concentration ( $\mu$ M) | Gd(III)+ DTPA-ZnNa <sub>3</sub> Survival Rate (%) | Gd(III) + Me-3,2-HOPO Survival Rate (%) |
|--------------------------|---------------------------------------------------|-----------------------------------------|
| 50                       | 91.78 $\pm$ 3.05**                                | 98.50 $\pm$ 2.11                        |
| 100                      | 92.56 $\pm$ 4.46**                                | 100.09 $\pm$ 4.09                       |
| 150                      | 92.15 $\pm$ 3.31**                                | 97.51 $\pm$ 3.62                        |
| 300                      | 95.69 $\pm$ 4.31                                  | 90.17 $\pm$ 2.77***                     |
| 450                      | 97.11 $\pm$ 4.06                                  | 69.69 $\pm$ 3.04***                     |
| 600                      | 101.46 $\pm$ 6.13                                 | 32.09 $\pm$ 1.54***                     |

**Table S5.** Dosage-dependent cell growth rate of AML-12 cells treated with 25  $\mu$ M Gd(III) and different concentrations of ligand (DTPA-ZnNa<sub>3</sub> or Me-3,2-HOPO), n = 6, \*p < 0.05, \*\*p < 0.01, \*\*\*p < 0.001 vs control.

| Concentration ( $\mu$ M) | Gd(III) + DTPA-ZnNa <sub>3</sub> Survival Rate (%) | Gd(III) + Me-3,2-HOPO Survival Rate (%) |
|--------------------------|----------------------------------------------------|-----------------------------------------|
| 50                       | 99.08 $\pm$ 2.33                                   | 103.52 $\pm$ 4.98                       |
| 100                      | 95.60 $\pm$ 3.33**                                 | 104.27 $\pm$ 2.84                       |
| 150                      | 92.35 $\pm$ 3.51***                                | 101.78 $\pm$ 7.07                       |
| 300                      | 94.37 $\pm$ 2.01***                                | 81.58 $\pm$ 7.07***                     |
| 450                      | 99.38 $\pm$ 2.57                                   | 40.30 $\pm$ 3.48***                     |
| 600                      | 96.16 $\pm$ 2.82*                                  | 16.42 $\pm$ 0.86***                     |

## S5. Gd(III) removal

**Table S6.** Gd(III) removal efficacy of NRK-52E cells exposed to gadolinium that were treated with DTPA-ZnNa<sub>3</sub> or Me-3,2-HOPO, n = 4, \*p < 0.05, \*\*p < 0.01, \*\*\*p < 0.001 vs gadolinium-exposed control.

| Group                            | Gd(III) (ng/10 <sup>6</sup> Cells) |
|----------------------------------|------------------------------------|
| Control                          | 231.19 ± 23.05                     |
| Gd(III) + DTPA-ZnNa <sub>3</sub> | 212.43 ± 23.24                     |
| Gd(III) + Me-3,2-HOPO            | 51.91 ± 4.74***                    |

**Table S7.** Gd(III) removal efficacy of AML-12 cells exposed to gadolinium that were treated with DTPA-ZnNa<sub>3</sub> or Me-3,2-HOPO, n = 4, \*p < 0.05, \*\*p < 0.01, \*\*\*p < 0.001 vs gadolinium-exposed control.

| Group                            | Gd(III) (ng/10 <sup>6</sup> Cells) |
|----------------------------------|------------------------------------|
| Control                          | 467.17 ± 49.45                     |
| Gd(III) + DTPA-ZnNa <sub>3</sub> | 337.75 ± 50.33**                   |
| Gd(III) + Me-3,2-HOPO            | 158.24 ± 17.43***                  |

## Reference:

1. G. M. Sheldrick, SHELXTL; Siemens Analytical X-ray Instruments Inc: Madison. WI, 2001.
2. N. E. Brese and M. O'Keeffe, *Acta. Cryst. B.*, 1991, **47**, 192-197.
